# Supplementary material for: A Causal and Inverse Relationship between Plant-Based Diet Intake and in a Two-Sample Mendelian Randomization Study
Source: MDPI journal article supplement (doi:10.3390/foods12030545), 2023-01-26
Supplement: s1 [file s1]

Supplementary Table S1. Genetic characteristics of instrumental variables

| SNP            | Chromos | Gene name       | Risk allele | Non-risk allele | PBD      |         | p val    | MAF     | MetS    | Glucose | Waist   |
|----------------|---------|-----------------|-------------|-----------------|----------|---------|----------|---------|---------|---------|---------|
|                |         |                 |             |                 | a        | beta    |          |         |         |         |         |
| 1 rs426706     | 1       | AGBL4           | G           | T               | -0.03217 | 0.01819 | 4.62E-05 | 0.6633  | 0.8573  | 0.5944  | 0.05698 |
| 2 rs12730380   | 1       | ENSG00000233290 | A           | G               | -0.04196 | 0.02013 | 1.56E-06 | 0.7546  | 0.7592  | 0.9089  | 0.179   |
| 3 rs2594678    | 1       | None            | A           | G               | -0.03452 | 0.01744 | 5.16E-06 | 0.5821  | 0.881   | 0.3677  | 0.09899 |
| 4 rs7581376    | 2       | RASGRP3         | A           | G               | 0.03623  | 0.01974 | 2.51E-05 | 0.2415  | 0.8945  | 0.244   | 0.9329  |
| 5 rs11122900   | 2       | ENSG00000286481 | G           | A               | 0.031408 | 0.01709 | 2.23E-05 | 0.488   | 0.5771  | 0.2383  | 0.7144  |
| 6 rs41493149   | 2       | LRP1B           | A           | G               | 0.033424 | 0.01742 | 9.21E-06 | 0.4072  | 0.1634  | 0.5759  | 0.9266  |
| 7 rs10207472   | 2       | None            | A           | G               | -0.06869 | 0.03754 | 2.51E-05 | 0.94378 | 0.106   | 0.7601  | 0.534   |
| 8 rs4663424    | 2       | None            | G           | A               | -0.0355  | 0.01801 | 5.54E-06 | 0.6495  | 0.6314  | 0.1435  | 0.2869  |
| 9 rs372517574  | 3       | SUMF1           | G           | C               | 0.098298 | 0.05558 | 4.68E-05 | 0.02271 | 0.663   | 0.4167  | 0.4772  |
| 10 rs62237505  | 3       | SGO1-AS1        | A           | G               | -0.08603 | 0.04816 | 3.88E-05 | 0.96492 | 0.3255  | 0.494   | 0.6952  |
| 11 rs6809021   | 3       | None            | G           | C               | 0.033424 | 0.01896 | 4.94E-05 | 0.2794  | 0.9169  | 0.01729 | 0.8876  |
| 12 rs6763709   | 3       | None            | A           | G               | 0.033021 | 0.0176  | 1.62E-05 | 0.3822  | 0.4947  | 0.5374  | 0.8267  |
| 13 rs16864262  | 3       | MBNL1           | A           | T               | -0.03391 | 0.0184  | 2.23E-05 | 0.6831  | 0.4213  | 0.6086  | 0.7239  |
| 14 rs559235    | 3       | None            | C           | T               | -0.03082 | 0.01728 | 3.96E-05 | 0.5447  | 0.8815  | 0.5262  | 0.3189  |
| 15 rs77335151  | 4       | NIPAL1          | G           | A               | 0.074816 | 0.0381  | 5.90E-06 | 0.05085 | 0.4475  | 0.6151  | 0.4465  |
| 16 rs112852183 | 4       | None            | C           | G               | -0.06068 | 0.03288 | 2.13E-05 | 0.92375 | 0.2512  | 0.8312  | 0.3534  |
| 17 rs4711416   | 6       | None            | T           | G               | 0.039811 | 0.0225  | 4.65E-05 | 0.1736  | 0.1917  | 0.2687  | 0.1898  |
| 18 rs75521460  | 9       | None            | A           | G               | 0.049606 | 0.02644 | 1.64E-05 | 0.1154  | 0.4534  | 0.4677  | 0.6691  |
| 19 rs1922159   | 10      | PCDH15          | C           | T               | -0.03175 | 0.01711 | 1.93E-05 | 0.5245  | 0.6909  | 0.473   | 0.3159  |
| 20 rs644205    | 10      | None            | G           | A               | -0.05849 | 0.0293  | 4.25E-06 | 0.90176 | 0.1961  | 0.01911 | 0.2211  |
| 21 rs808425    | 10      | None            | G           | T               | 0.03623  | 0.02026 | 4.11E-05 | 0.2264  | 0.5157  | 0.1181  | 0.4566  |
| 22 rs7116119   | 11      | SLC22A9         | C           | T               | 0.03583  | 0.01896 | 1.21E-05 | 0.2768  | 0.2615  | 0.1388  | 0.1392  |
| 23 rs112382545 | 11      | ETS1            | A           | G               | 0.05038  | 0.02725 | 2.19E-05 | 0.1079  | 0.144   | 0.5212  | 0.4999  |
| 24 rs7135559   | 12      | PTPRQ           | C           | A               | -0.03245 | 0.01758 | 2.14E-05 | 0.6075  | 0.547   | 0.3606  | 0.471   |
| 25 rs9509286   | 13      | IFT88           | T           | G               | 0.032216 | 0.01792 | 3.89E-05 | 0.337   | 0.05646 | 0.2966  | 0.7691  |
| 26 rs7323767   | 13      | None            | A           | G               | -0.0318  | 0.018   | 4.78E-05 | 0.6482  | 0.1084  | 0.4323  | 0.713   |

|    |            |              |   |   |          |         |          |         |         |         |         |
|----|------------|--------------|---|---|----------|---------|----------|---------|---------|---------|---------|
| 27 | rs9556416  | 13 SOX21-AS1 | A | G | -0.04769 | 0.02682 | 4.22E-05 | 0.8809  | 0.3253  | 0.27    | 0.02921 |
| 28 | rs9805972  | 14 LINC02307 | T | C | 0.041787 | 0.02212 | 1.26E-05 | 0.1795  | 0.594   | 0.9479  | 0.8336  |
| 29 | rs7156733  | 14 SAMD4A    | G | A | -0.05889 | 0.03324 | 4.52E-05 | 0.92547 | 0.3506  | 0.229   | 0.3395  |
| 30 | rs11844430 | 14 None      | T | C | -0.03306 | 0.01722 | 9.90E-06 | 0.5393  | 0.319   | 0.05507 | 0.5313  |
| 31 | rs77956082 | 15 None      | A | G | 0.049606 | 0.02575 | 8.89E-06 | 0.1219  | 0.08589 | 0.8881  | 0.9342  |
| 32 | rs12930358 | 16 RBFOX1    | C | G | 0.040207 | 0.02259 | 3.89E-05 | 0.1675  | 0.723   | 0.2881  | 0.3517  |
| 33 | rs7185137  | 16 None      | C | T | 0.032216 | 0.01714 | 1.56E-05 | 0.4778  | 0.25    | 0.6352  | 0.5967  |
| 34 | rs55747549 | 16 MEAK7     | G | C | -0.03654 | 0.01992 | 2.39E-05 | 0.7512  | 0.8244  | 0.7325  | 0.6558  |
| 35 | rs2637364  | 17 ASIC2     | T | C | 0.031408 | 0.01756 | 4.22E-05 | 0.3803  | 0.4163  | 0.161   | 0.8295  |
| 36 | rs12455899 | 18 None      | T | C | -0.04225 | 0.02398 | 4.99E-05 | 0.847   | 0.555   | 0.3192  | 0.2597  |
| 37 | rs28628729 | 18 None      | A | G | 0.03583  | 0.02021 | 4.74E-05 | 0.2287  | 0.2568  | 0.6516  | 0.3574  |
| 38 | rs6117294  | 20 CASC20    | T | G | -0.0332  | 0.01881 | 4.87E-05 | 0.7079  | 0.3384  | 0.5871  | 0.3857  |
| 39 | rs6095646  | 20 None      | A | G | 0.039017 | 0.02118 | 2.12E-05 | 0.2014  | 0.9802  | 0.8958  | 0.4464  |
| 40 | rs6013304  | 20 None      | A | C | -0.03863 | 0.01994 | 8.14E-06 | 0.7477  | 0.4732  | 0.8153  | 0.5697  |
| 41 | rs6128258  | 20 None      | C | T | 0.037426 | 0.02048 | 2.82E-05 | 0.2202  | 0.2956  | 0.3893  | 0.5655  |
| 42 | rs743492   | 21 TSPEAR    | A | G | 0.03623  | 0.01834 | 5.18E-06 | 0.3139  | 0.583   | 0.2909  | 0.5037  |

| P value |          |         |        |
|---------|----------|---------|--------|
| BP      | TG       | AST/ALT | HDL    |
| 0.3107  | 0.2779   | 0.05698 | 0.4193 |
| 0.4558  | 0.2831   | 0.179   | 0.7844 |
| 0.7711  | 0.4979   | 0.09899 | 0.9246 |
| 0.2955  | 0.1453   | 0.9329  | 0.828  |
| 0.7685  | 0.8827   | 0.7144  | 0.396  |
| 0.1963  | 0.1037   | 0.9266  | 0.5741 |
| 0.4547  | 0.4902   | 0.534   | 0.1008 |
| 0.5937  | 0.8964   | 0.2869  | 0.2785 |
| 0.9904  | 0.444    | 0.4772  | 0.8883 |
| 0.6372  | 0.9575   | 0.6952  | 0.6553 |
| 0.09206 | 0.6176   | 0.8876  | 0.5745 |
| 0.1264  | 0.328    | 0.8267  | 0.5163 |
| 0.3177  | 0.8432   | 0.7239  | 0.5871 |
| 0.194   | 0.5821   | 0.3189  | 0.4389 |
| 0.575   | 0.9024   | 0.4465  | 0.9592 |
| 0.4861  | 0.004604 | 0.3534  | 0.1759 |
| 0.9314  | 0.8605   | 0.1898  | 0.1189 |
| 0.6615  | 0.09482  | 0.6691  | 0.442  |
| 0.8507  | 0.9105   | 0.3159  | 0.1041 |
| 0.7782  | 0.01475  | 0.2211  | 0.3271 |
| 0.4117  | 0.446    | 0.4566  | 0.6905 |
| 0.7309  | 0.7781   | 0.1392  | 0.8404 |
| 0.7677  | 0.2615   | 0.4999  | 0.9518 |
| 0.4224  | 0.2524   | 0.471   | 0.4909 |
| 0.8582  | 0.5921   | 0.7691  | 0.4422 |
| 0.1188  | 0.1691   | 0.713   | 0.3582 |

|        |         |         |          |
|--------|---------|---------|----------|
| 0.4493 | 0.5356  | 0.02921 | 0.5617   |
| 0.9494 | 0.2459  | 0.8336  | 0.8206   |
| 0.6527 | 0.4446  | 0.3395  | 0.155    |
| 0.6898 | 0.7326  | 0.5313  | 0.007766 |
| 0.8372 | 0.04029 | 0.9342  | 0.08622  |
| 0.4534 | 0.7227  | 0.3517  | 0.0716   |
| 0.5966 | 0.5161  | 0.5967  | 0.9778   |
| 0.8817 | 0.1767  | 0.6558  | 0.7906   |
| 0.3539 | 0.2773  | 0.8295  | 0.1385   |
| 0.9995 | 0.2894  | 0.2597  | 0.01807  |
| 0.374  | 0.9942  | 0.3574  | 0.962    |
| 0.5989 | 0.8375  | 0.3857  | 0.05375  |
| 0.409  | 0.894   | 0.4464  | 0.2708   |
| 0.313  | 0.5267  | 0.5697  | 0.2551   |
| 0.7221 | 0.0384  | 0.5655  | 0.3077   |
| 0.6427 | 0.2004  | 0.5037  | 0.9612   |
